# Supplementary material for: Synthesis of polysiloxane elastomers modified with sulfonyl side groups and their electromechanical response
Source: Royal Society of Chemistry journal article supplement (doi:10.1039/d3tc00200d), 2023-01-01
Supplement: d3tc00200d1.pdf [file d3tc00200d1.pdf]

## Supporting Information

### Synthesis of polysiloxane elastomers modified with sulfonyl side groups and their electromechanical response

Yauhen Sheima,<sup>a,b</sup> Thulasinath Raman Venkatesan,<sup>a</sup> Holger Frauenrath,<sup>b</sup> and Dorina M. Opris\*<sup>a</sup>

<sup>a</sup> Laboratory for Functional Polymers Swiss Federal Laboratories for Materials Science and Technology Empa Überlandstrasse 129, Dübendorf CH-8600, Switzerland, email: Dorina.opris@empa.ch

<sup>b</sup> Institute of Chemical Sciences and Engineering Ecole Polytechnique Fédérale de Lausanne (EPFL) Station 6, Lausanne CH-1015, Switzerland

† Electronic Supplementary Information (ESI) available: [details of any supplementary information available should be included here]. See DOI: 10.1039/x0xx00000x

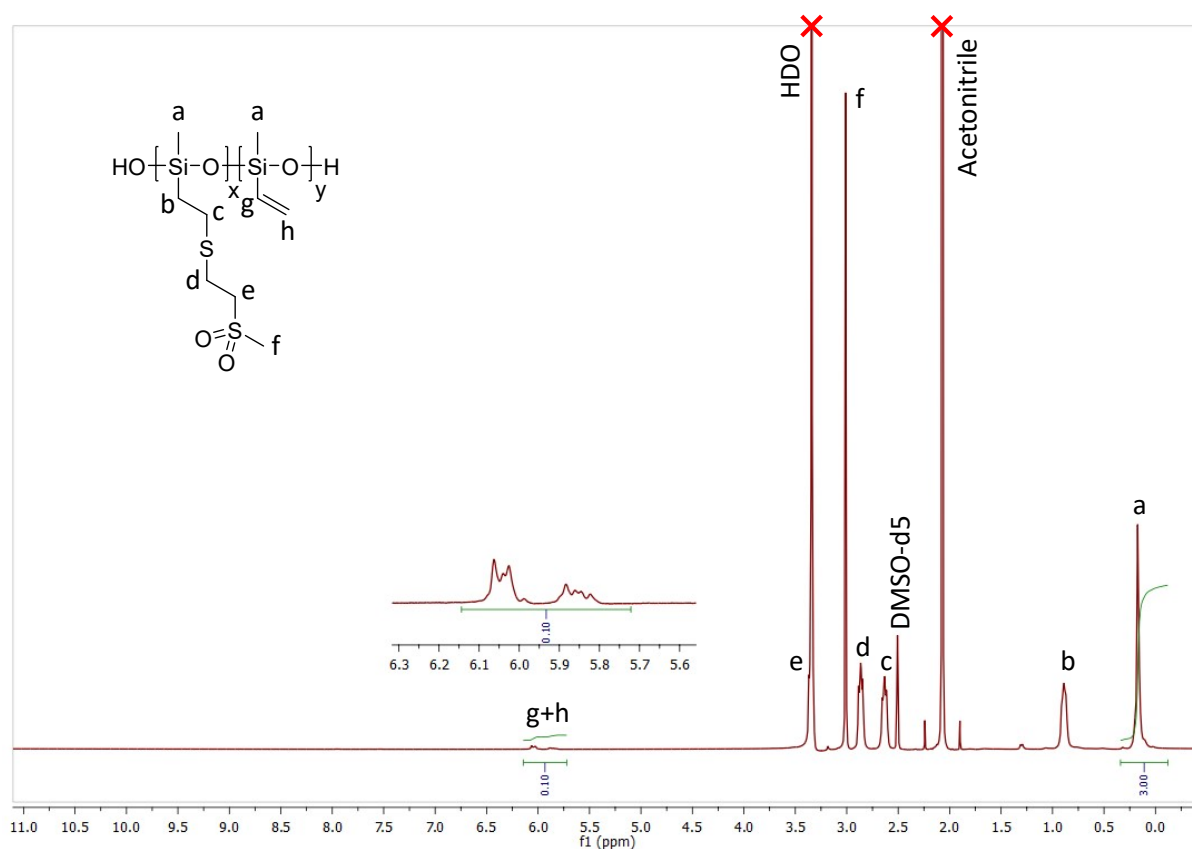

**Figure S1.** <sup>1</sup>H NMR spectrum of polysiloxane functionalized with 2-(methylsulfonyl)-ethanethiol side groups **PSu** (60 wt% in acetonitrile).

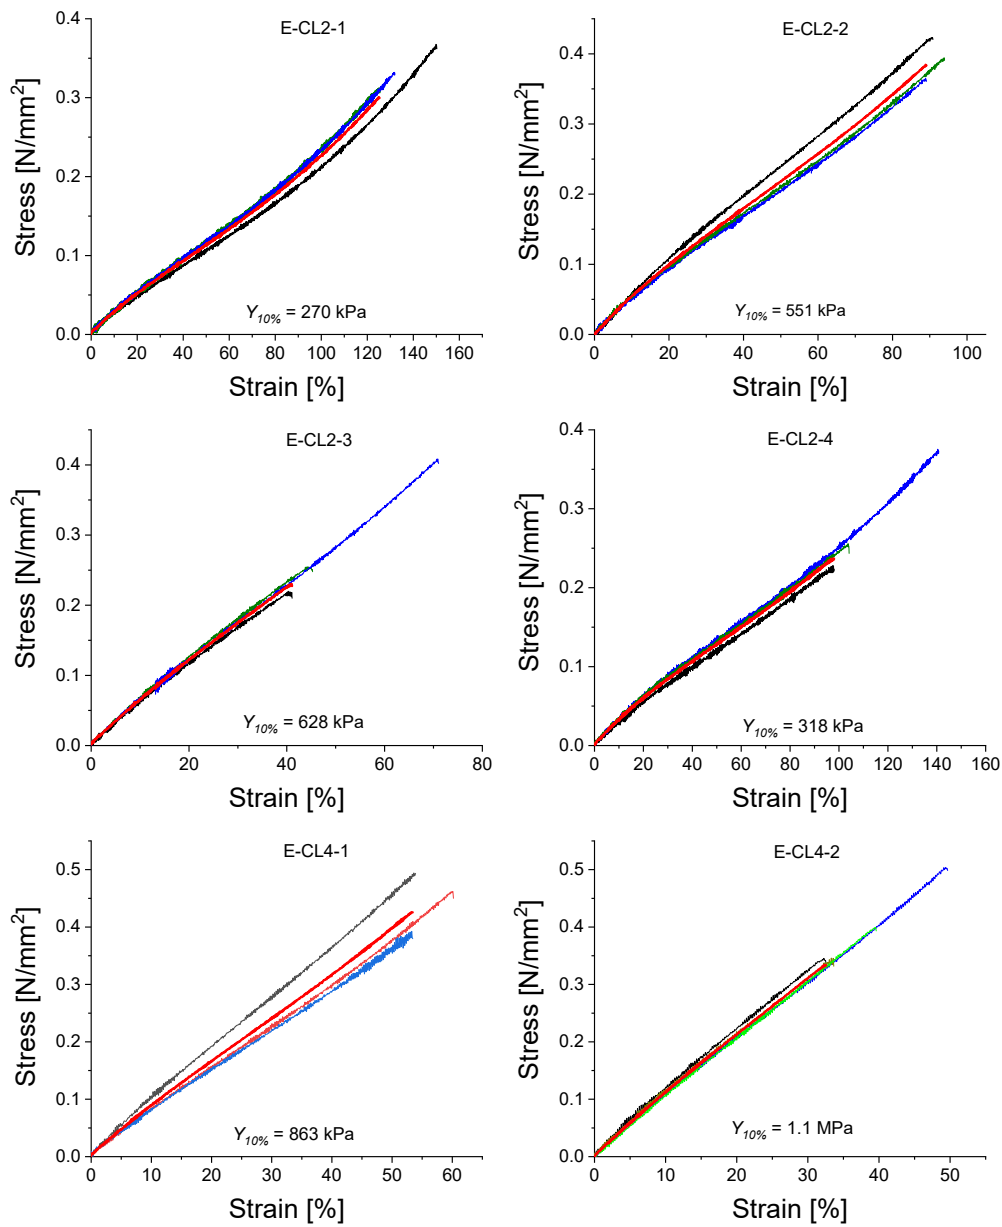

**Figure S2.** Stress-strain curves of elastomers **E-CLx-Y**. The red curve in each graph is the average of several measurements.

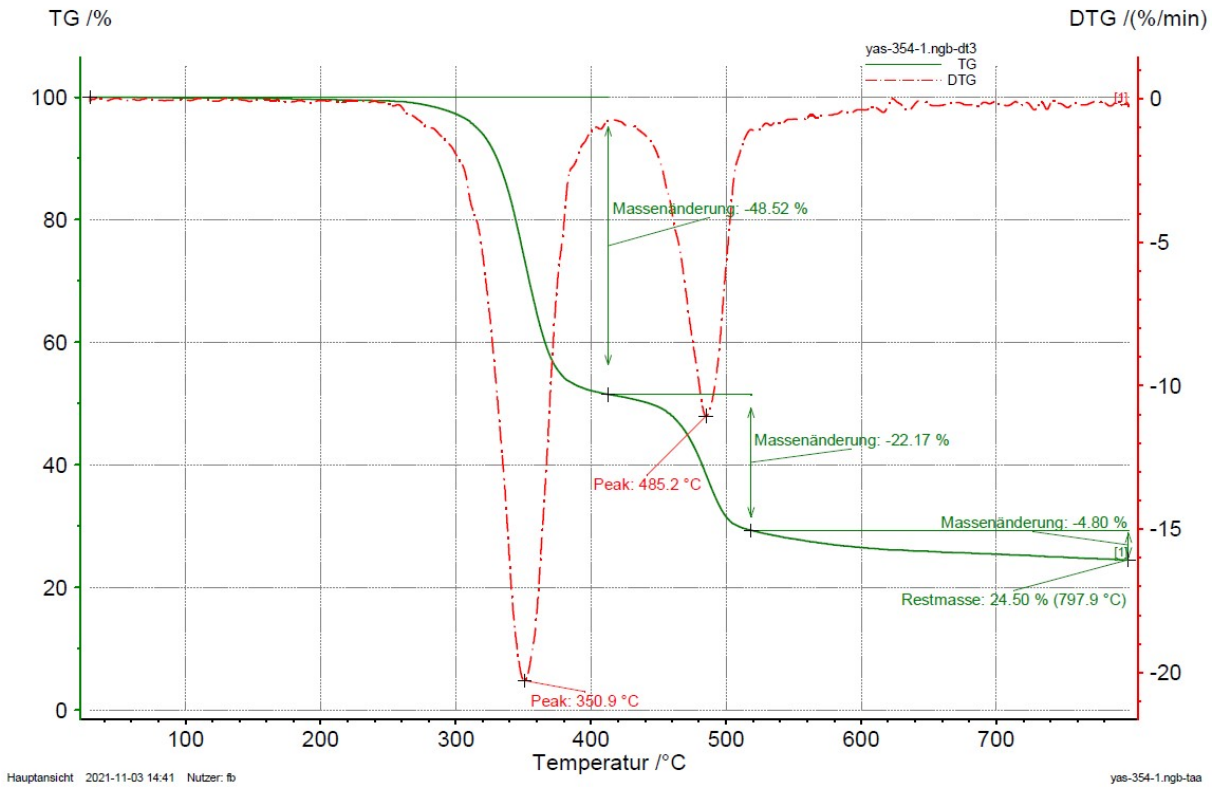

**Figure S3.** TGA curve of **E-CL2-3**

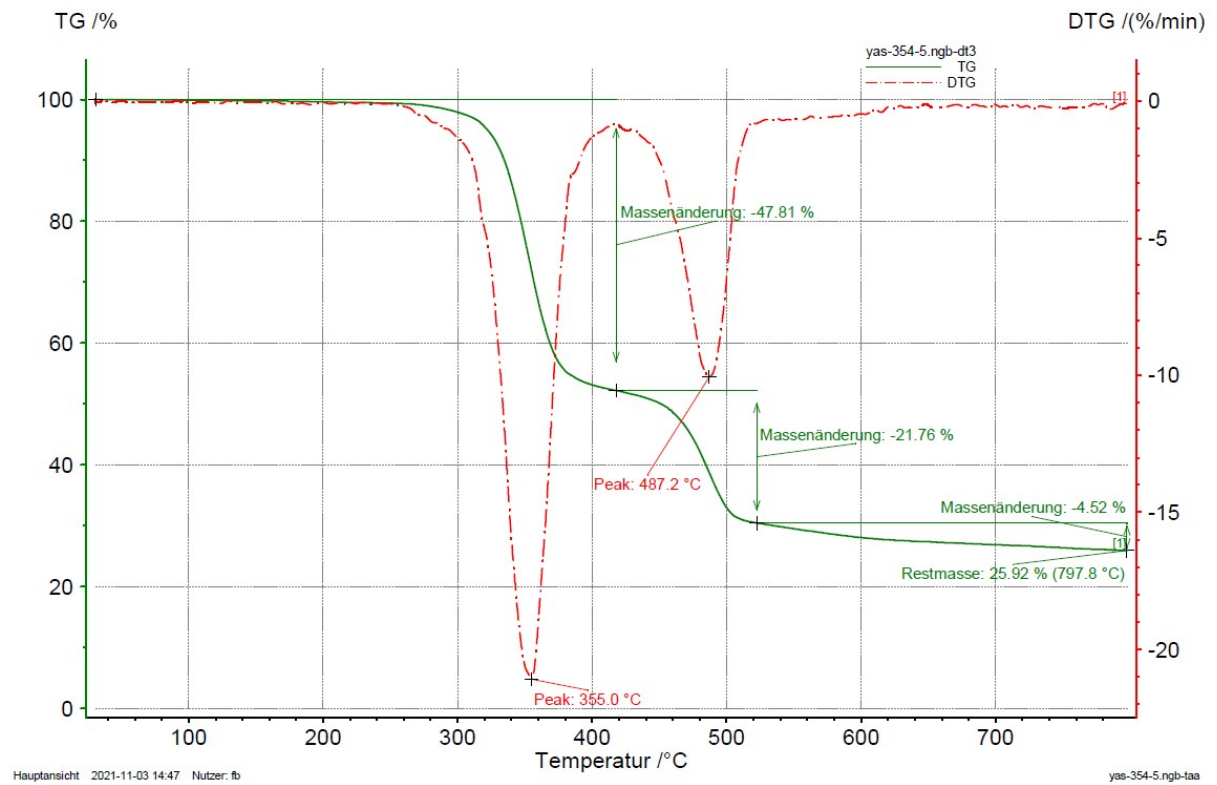

**Figure S4.** TGA curve of **E-CL4-2**

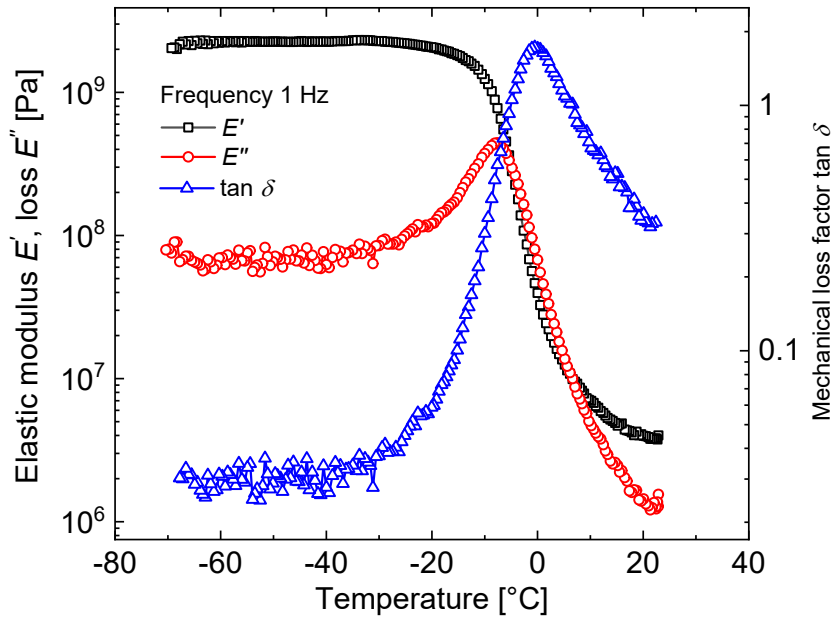

**Figure S5.** DMA measurement of **E-CL4-2** from -70 to 20 °C at 1 Hz. The peak in  $\tan \delta$  at 0 °C represents the glass transition temperature.

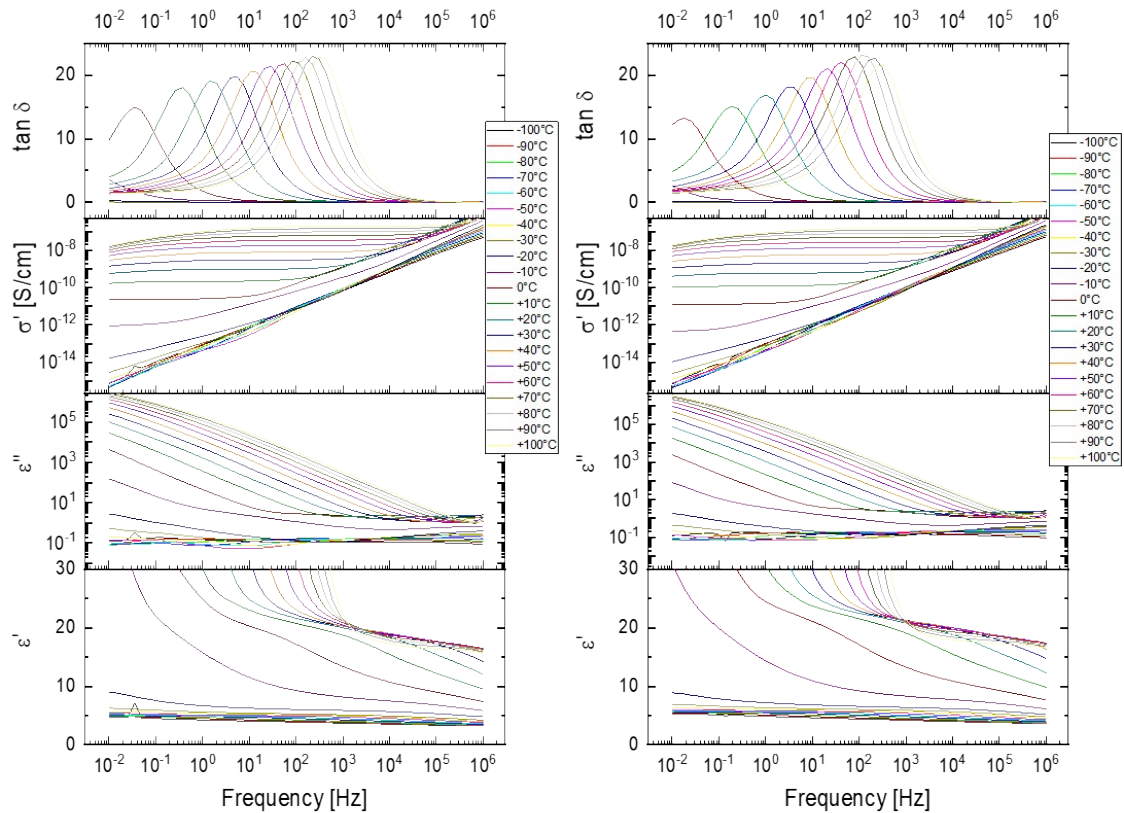

**Figure S6.** Dielectric permittivity ( $\epsilon'$ ), dielectric loss ( $\epsilon''$ ), conductivity ( $\sigma'$ ), and  $\tan \delta$  of **E-CL2-3** (left) and **E-CL4-2** (right) at different temperatures and frequencies.

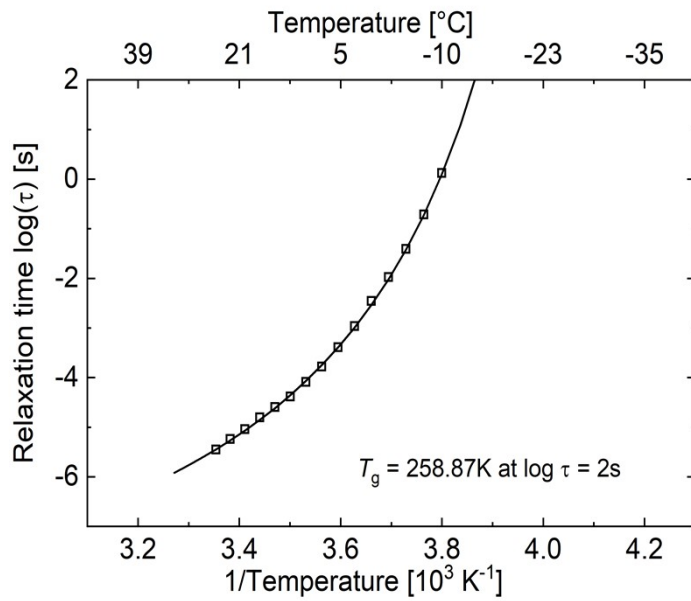

**Figure S7.** Arrhenius plot of the relaxation time versus temperature exhibiting Vogel-Fulcher-Tamman (VFT) behavior. A  $T_g$  of  $-14.3\text{ }^\circ\text{C}$ , close to the DSC value, was calculated at a relaxation time of  $100\text{ s}$  ( $\log \tau = 2\text{ s}$ ).

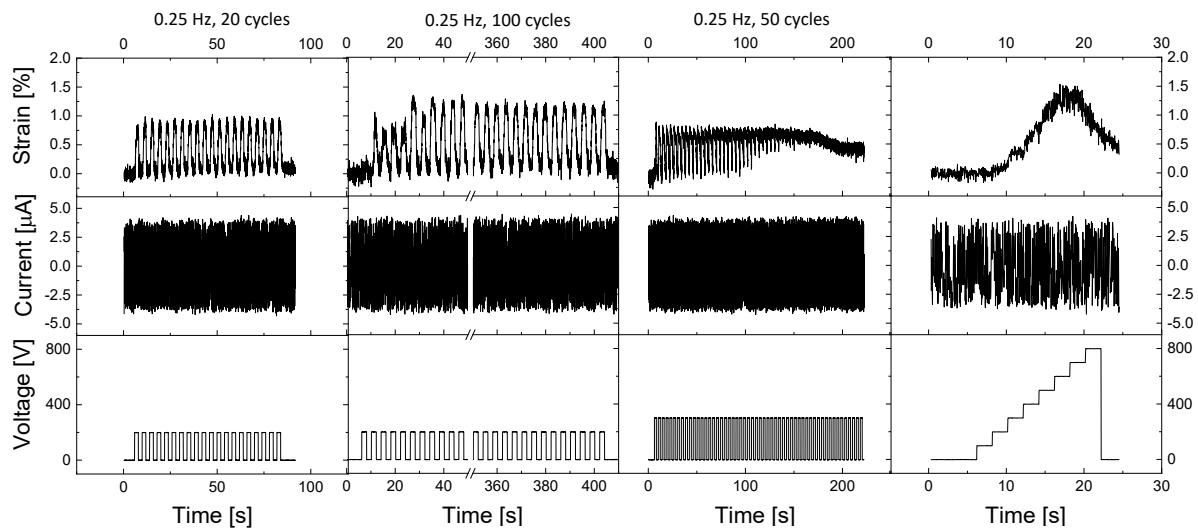

**Figure S8.** Actuator is made of material **E-CL2-3** with a thickness of  $101\text{ }\mu\text{m}$ . Four of more than ten measurements are presented, which describe the typical behavior of this actuator. First, the measurements were done at  $200\text{ V}$ . When voltage was increased to  $300\text{ V}$ , deterioration of actuation happened. Subsequent application of  $800\text{ V}$  didn't result in a higher actuation strain.

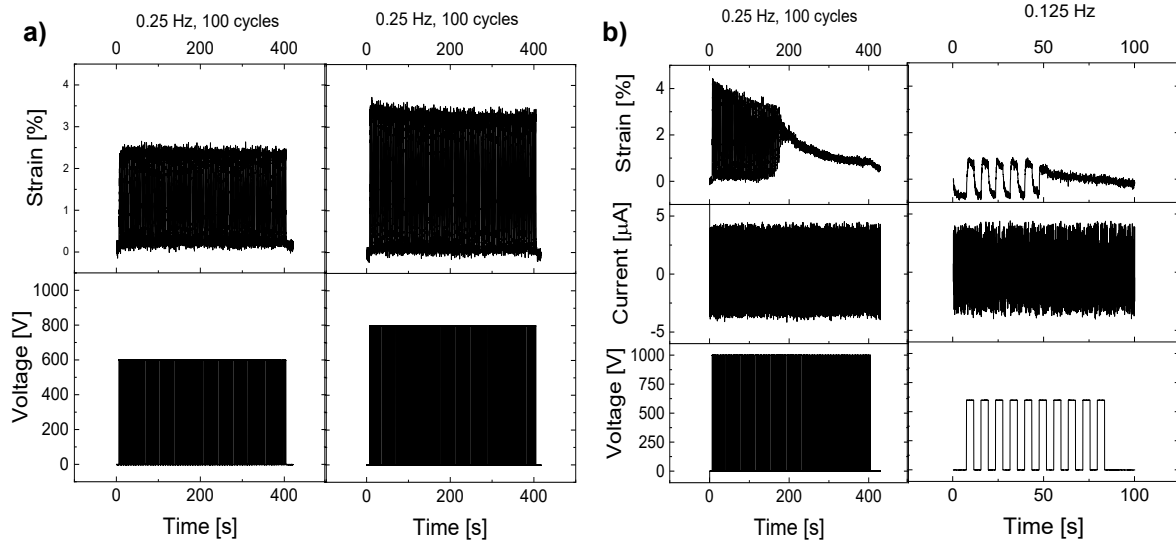

**Figure S9.** Actuation of a 99  $\mu\text{m}$  thick actuator made of material **E-CL4-2**: a) stable actuation over 100 cycles at 600 V and 800 V and 0.25 Hz; b) degradation of actuation during the 100 cycles test at 1000 V and 0.25 Hz, and subsequent bad actuation at 600 V and 0.125 Hz.

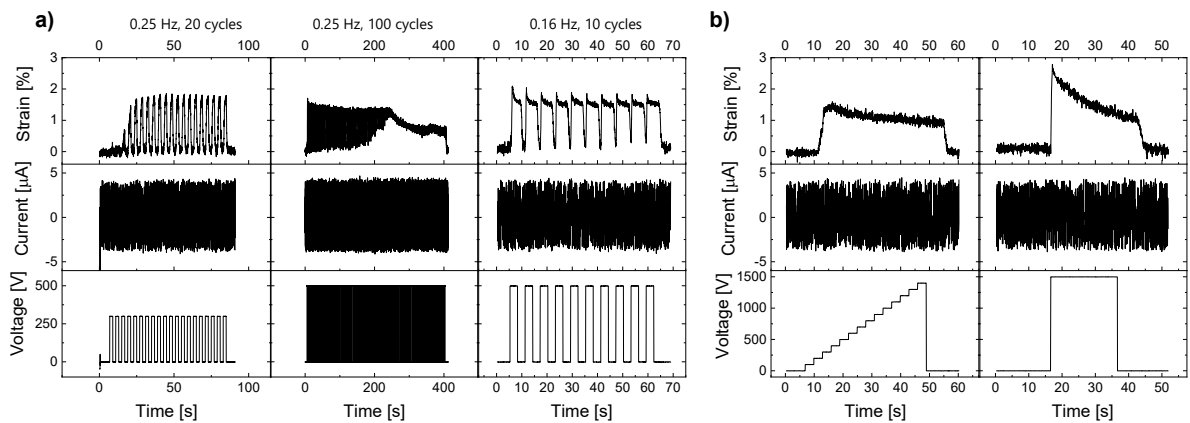

**Figure S10.** Actuation of a 101  $\mu\text{m}$  thick actuator made of material **E-CL4-2**: a) a 1.8% strain is detected at 300 V and 0.25 Hz. Increasing the voltage to 500 V resulted in a deterioration of actuation. Subsequent application of 500 V at lower frequency (0.16 Hz) resulted in 1.8% actuation, but it can be seen that the actuator doesn't have enough time to relax back to the initial state; b) step voltage increase measurement up to 1500 V and a constant application of 1500 V withing 20 s.

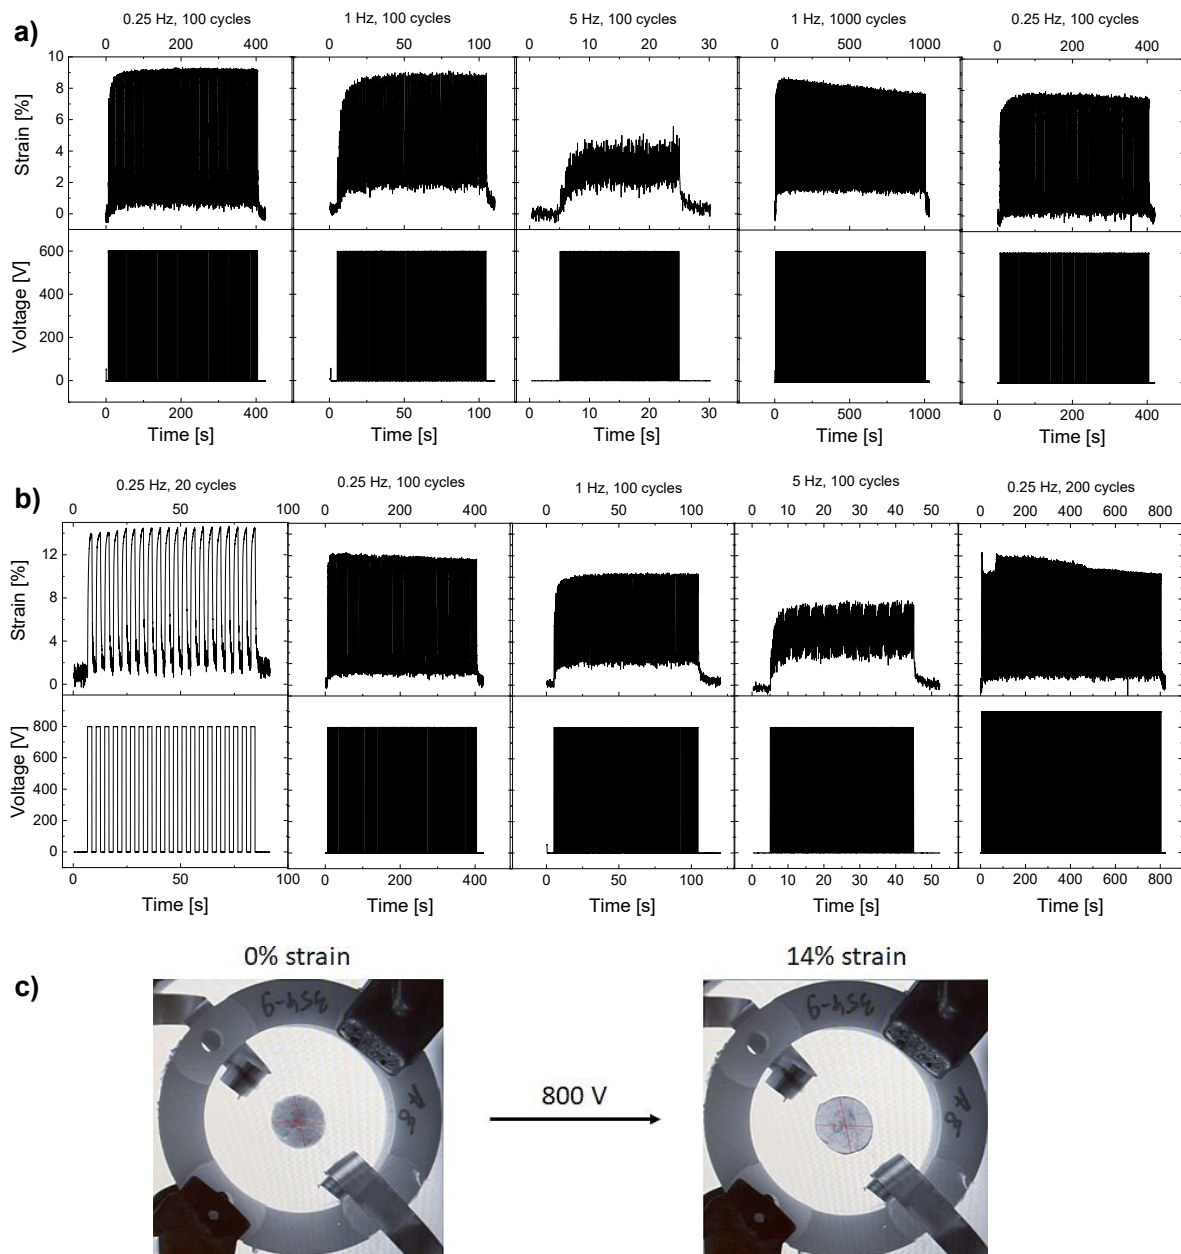

**Figure S11.** Actuation of a 33  $\mu\text{m}$  thick actuator made of material **E-CL2-3**: a) actuation at 600 V and different frequencies; b) actuation at 800 V and different frequencies; c) photo of the actuator in relaxed and actuated (800 V, 0.25 Hz, 20c) states.

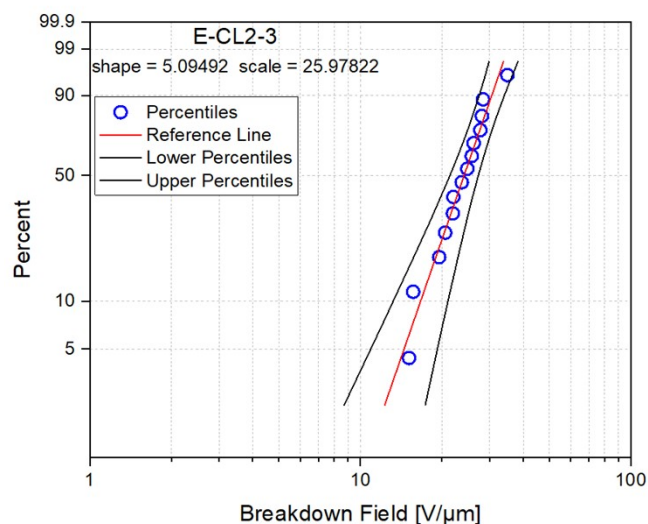

**Figure S12.** Weibull probability plot of breakdown field for materials **E-CL2-3**. The breakdown strength was tested by placing the material between two metallic electrodes of 1 mm<sup>2</sup> and gradually increasing the voltage until the breakdown was reached. At least ten samples with thicknesses in the range of 100-130 μm were tested. The average breakdown strength was 24 V μm<sup>-1</sup>.

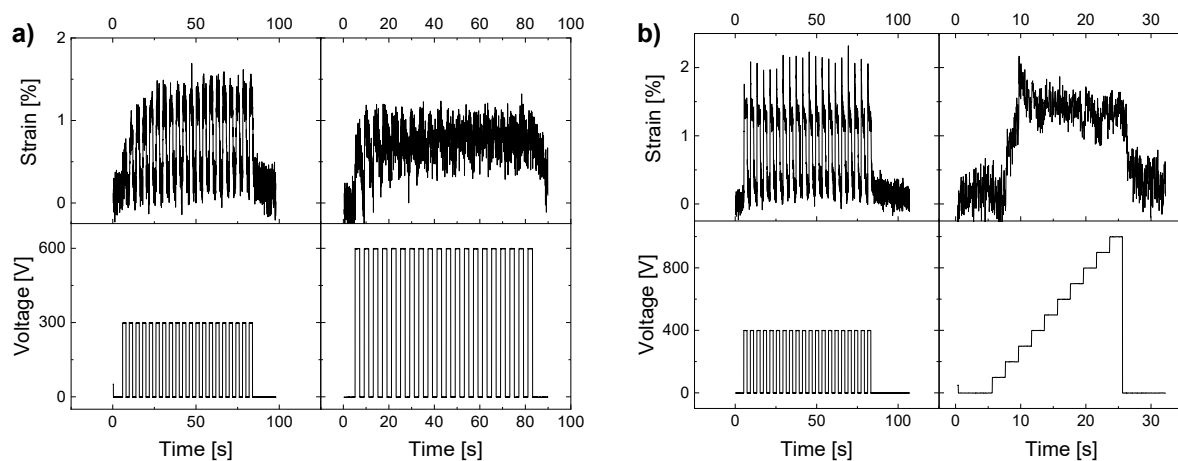

**Figure S13.** Actuation response of **E-CL4-2**: a) 34 μm film; b) 33 μm film.
